# Supplementary material for: Node disjoint path construction algorithm in the folded divide-and-swap cube
Source: PeerJ journal article supplement (doi:10.7717/peerj-cs.3458), 2026-01-27
Supplement: data_StaffER.xlsx [file data_StaffER.xlsx]

## Sheet: Sheet2
dimension	Experimental average path lengths	Experimental average of the maximum path lengths	Theoretical maximum path lengths
2	1	2	2
4	3	5	7
8	7	10	17
16	10	14	25
32	16	26	41
64	26	49	73
128	45	97	137
256	77	191	265
